# Supplementary material
Source: PubMed Central journal article supplement (PMC8088126)
Supplement: MCB.00515-20-s0008.pdf [file MCB.00515-20-s0008.pdf]

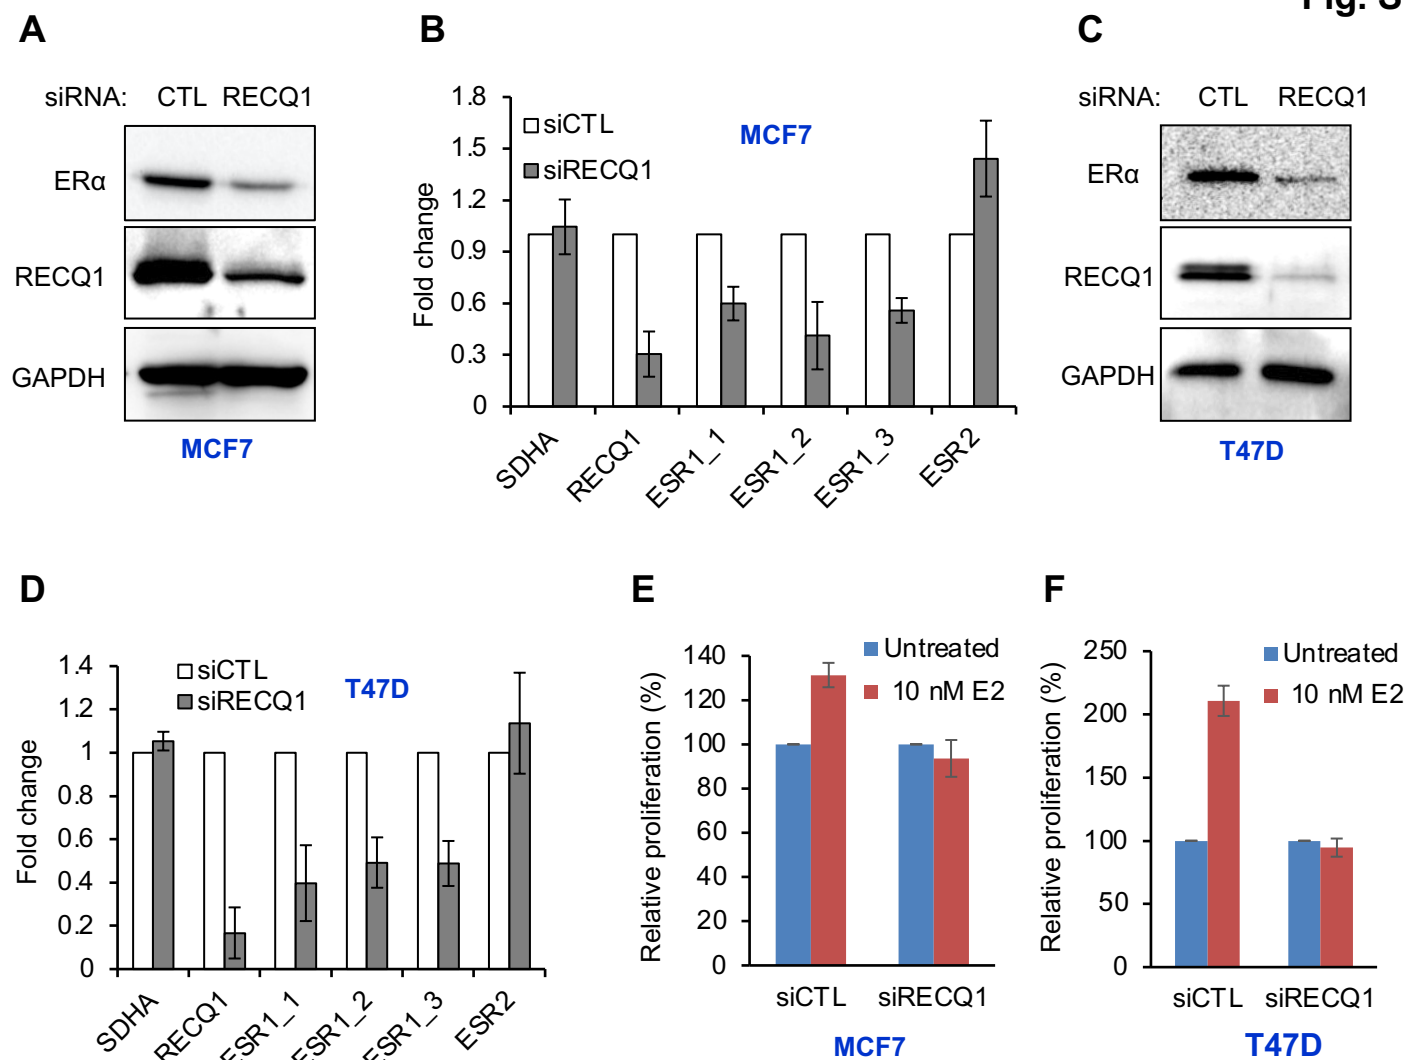

**Fig. S1. RECQ1 depletion results in decreased ER $\alpha$  expression and impaired estrogen-stimulated proliferation in ER-positive breast cancer cells.**

(A-D) MCF7 and T47D cells grown in regular full medium were transfected with control (CTL) siRNA or *RECQ1* siRNAs for 48 hr. Immunoblotting was performed using GAPDH as loading control to determine the effect of *RECQ1* knockdown on ER $\alpha$  and RECQ1 protein levels (A and C). RT-qPCR was performed to measure the effect on mRNA levels of *RECQ1* and *ESR1* (the gene encoding ER $\alpha$ ) (B and D). The housekeeping gene *SDHA* served as a negative control in RT-qPCR. Note that in panel B, *ESR1\_1*, *ESR1\_2* and *ESR1\_3* are 3 primers different primer pairs to measure *ESR1* expression. *ESR2* encodes ER $\beta$ .

(E, F) 48 hr after siRNA transfection, MCF7 or T47D cells growing in phenol-red free medium containing 5% charcoal-stripped fetal bovine serum (i.e. hormone deprived medium) were treated with 10 nM 17 $\beta$ -estradiol (E2) or 0.1% ethanol and cell proliferation was measured by CCK8 assays after 48 hr. Note that in panel D, *ESR1\_1*, *ESR1\_2* and *ESR1\_3* are 3 primers different primer pairs to measure *ESR1* expression. *ESR2* encodes ER $\beta$ .

A

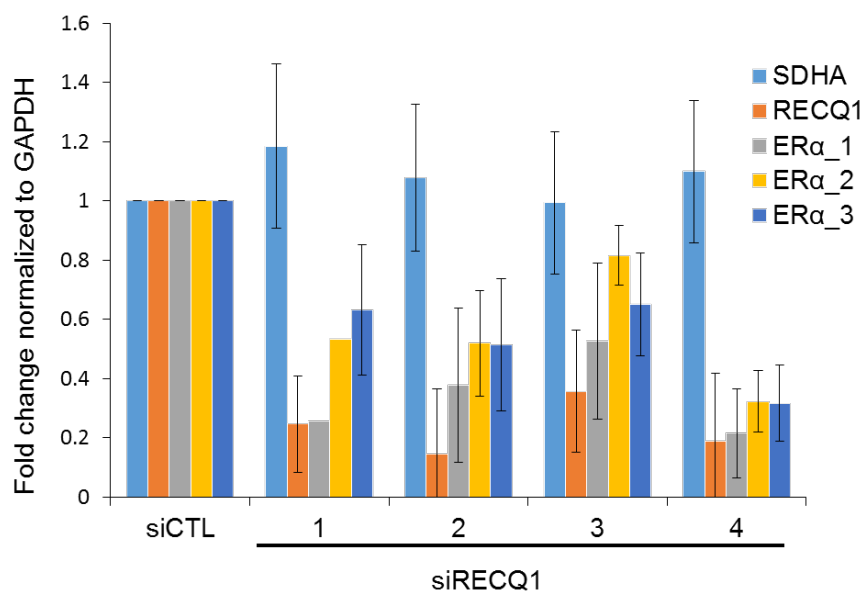

Target Sequences of siRNA:

1. GAGCUUAUGUUACCAGUUA
2. CUACGGCUUUGGAGAUUA
3. GAUUUAAGGCACUUGGUA
4. GGGCAAGCAAUGAAUAUGA

B

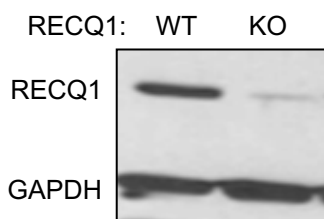

C

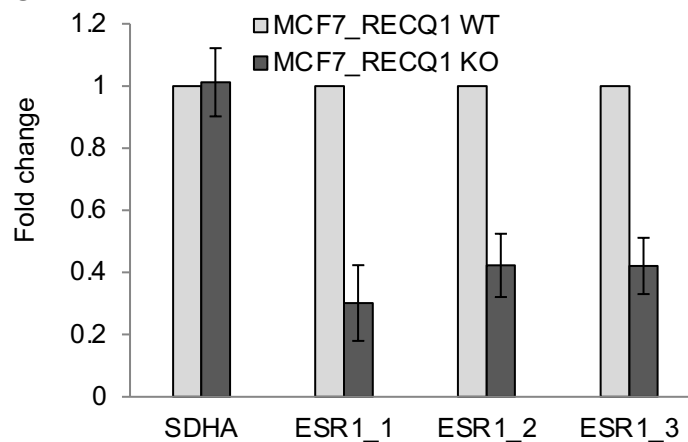

**Fig. S2. Loss of RECQ1 in MCF7 cells leads to decreased ESR1 expression.**

- MCF7 cells were transfected with CTL siRNA or 4 independent RECQ1 siRNAs for 48 hr and the effect on RECQ1 and ESR1 (using 3 different primers) was determined by RT-qPCR normalized to GAPDH. The housekeeping gene SDHA was used as a negative control.
- CRISPR/Cas9 was used to deplete RECQ1 in MCF7 cells and the effect on RECQ1 protein was determined by immunoblotting from a wild-type clone (WT) and a RECQ1 knockout (KO) clone using GAPDH as loading control. Note that this approach resulted in substantial decrease but not complete loss of RECQ1 protein.
- RT-qPCR from MCF7 RECQ1 WT and isogenic RECQ1 KO cells shows substantial decrease in ESR1 expression using 3 independent primers. The housekeeping gene SDHA was used as negative control.

A

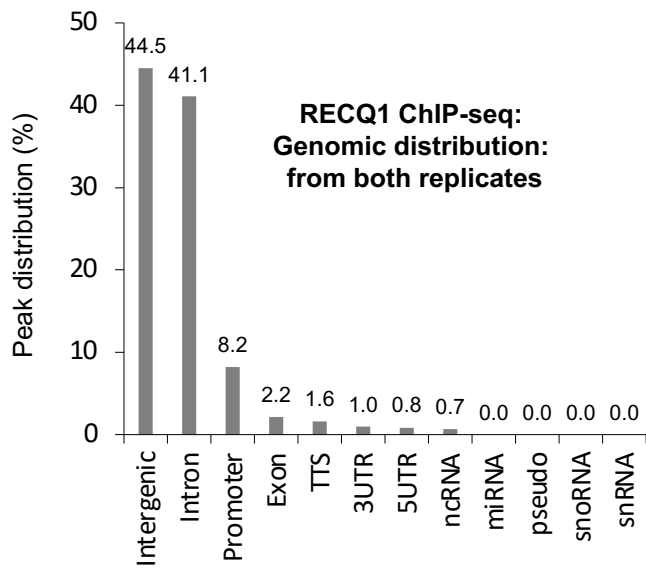

B

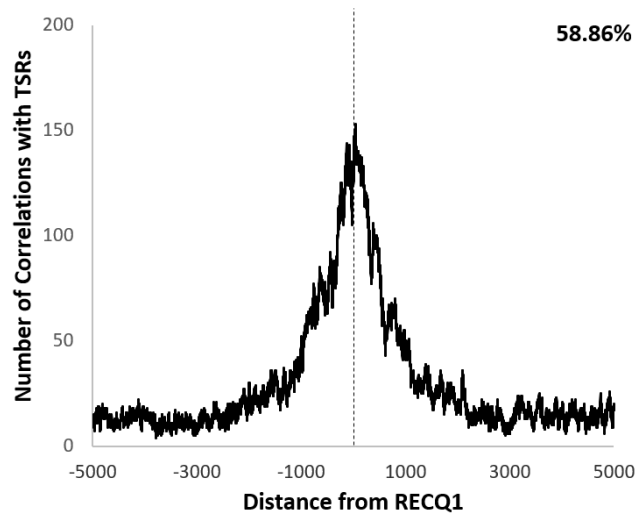

C

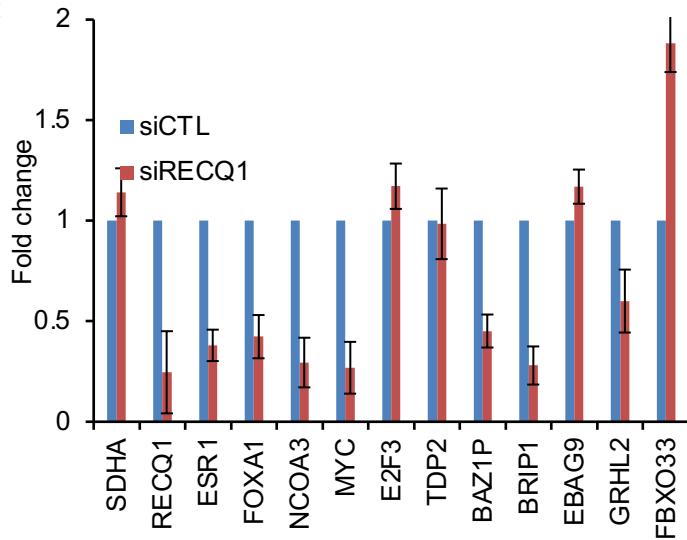

**Fig. S3. Genomic distribution of RECQ1 ChIP-seq peaks.**

- A. Data from both RECQ1 ChIP-seq replicates show that RECQ1 peaks are mostly observed in introns and intergenic regions.
- B. Colocalization of the RECQ1 binding sites with transcriptional start regions (TSRs). The histogram x axis extends 5-kb upstream and 5-kb downstream from the center of the RECQ1 peaks. The extent of colocalization (%) is measured as the fraction of RECQ1 peaks within the 5-kb window of the TSRs. (see the Materials and Methods section for details).
- C. MCF7 cells were transfected with CTL siRNA or *RECQ1* siRNAs and the expression of genes validated by ChIP-qPCR (Figure 4B) was assessed by RT-qPCR normalized to *GAPDH*. The housekeeping gene *SDHA* was used as negative control.

B

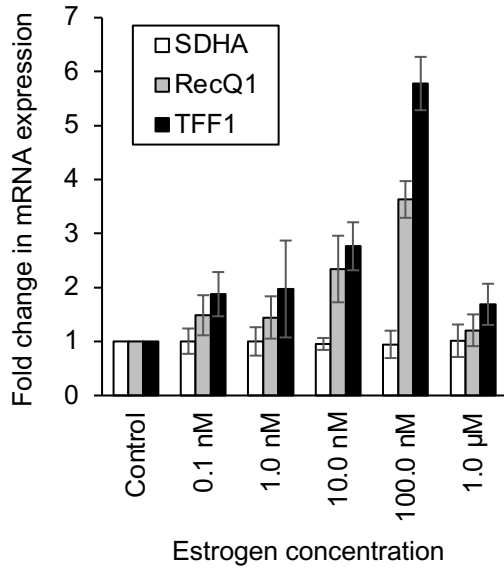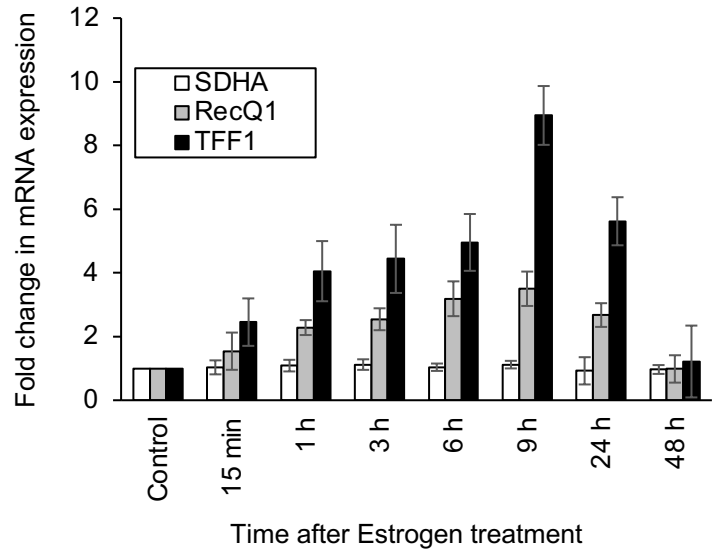

**Fig. S4. Upregulation of RECQ1 by estrogen.** MCF7 cells grown in hormone deprived medium cells were treated with 0.1% ethanol (control) or an indicated dose of  $17\beta$ -estradiol (E2) for 6 hours (A), and with 10 nm of E2 for indicated time points (B). Expression levels of RECQ1 and TFF1 were measured by RT-qPCR. The housekeeping gene SDHA was used as negative control.

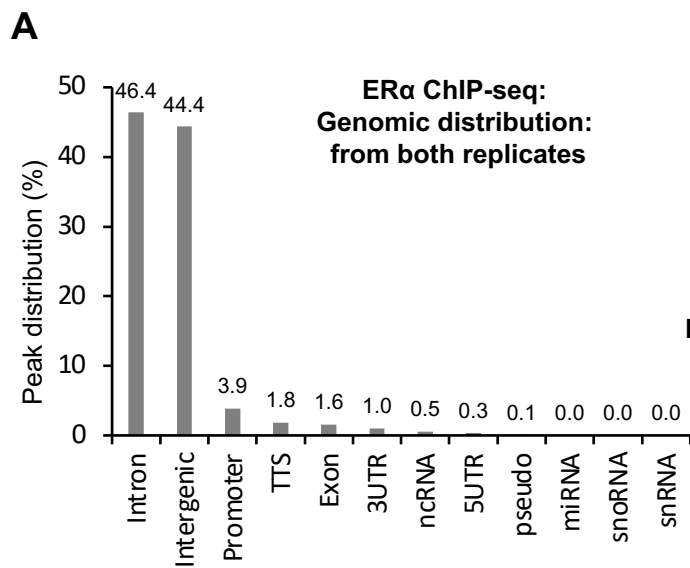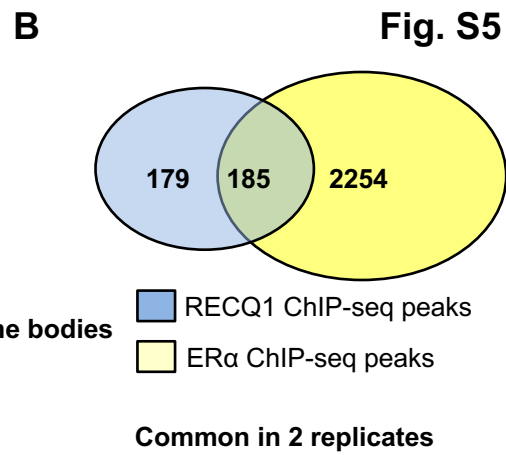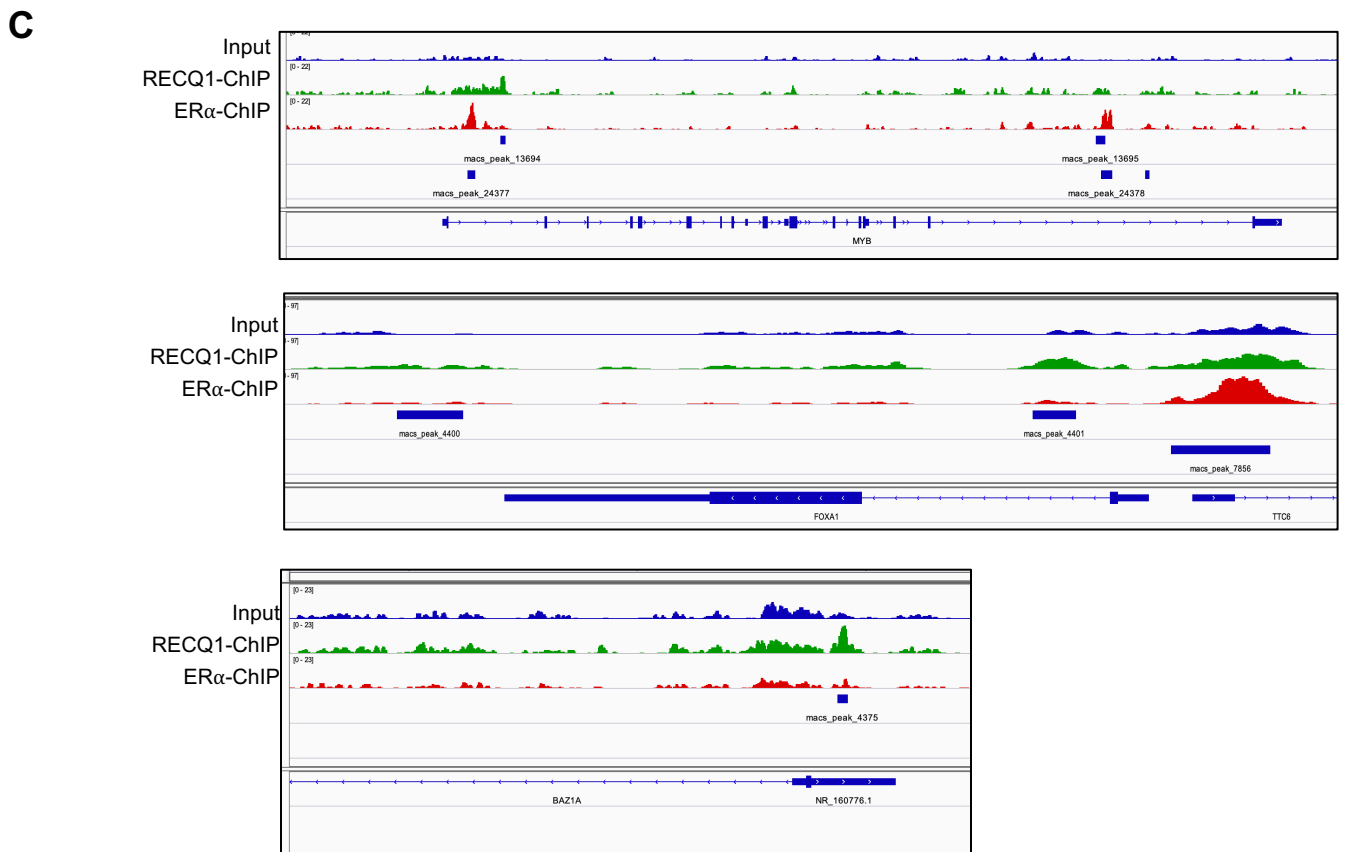

**Fig. S5. Genomic distribution of ER $\alpha$  ChIP-seq peaks.**

- A. Data from both ER $\alpha$  ChIP-seq replicates show that ER $\alpha$  peaks are mostly observed in introns and intergenic regions.
- B. Venn diagram shows the comparison of ER $\alpha$  and RECQ1 ChIP-seq peaks at promoters and gene bodies from 2 replicates.
- C. IGV snapshots is shown for binding of RECQ1 and ER $\alpha$  at the promoters or gene bodies of of select RECQ1 target genes (MYB, FOXA1 and BAZ1A). These genes were also validated by ChIP-qPCR for RECQ1 in Fig. 3B.

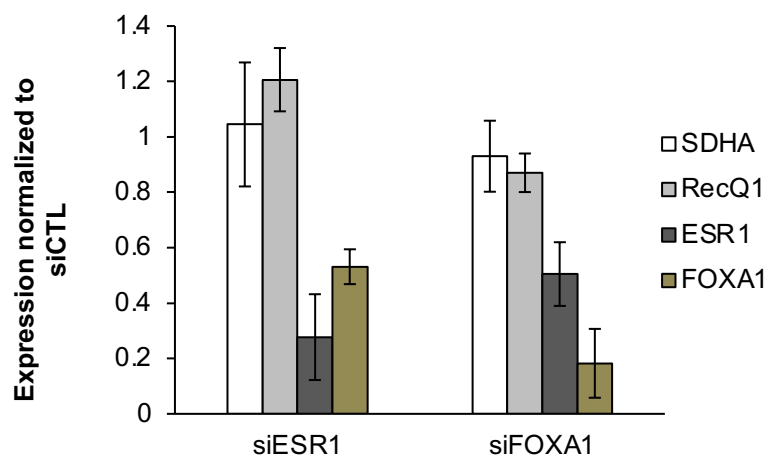

**Fig. S6. FOXA1 or ER $\alpha$  knockdown has no impact on expression of RECQ1 in MCF-7 cell line.**

MCF7 cells were transfected with CTL siRNA or FOXA1 siRNAs (Smartpool) for 48 hr and the effect on RECQ1, ESR1 and FOXA1 mRNA was determined by RT-qPCR normalized to GAPDH. The housekeeping gene SDHA was used as a negative control.

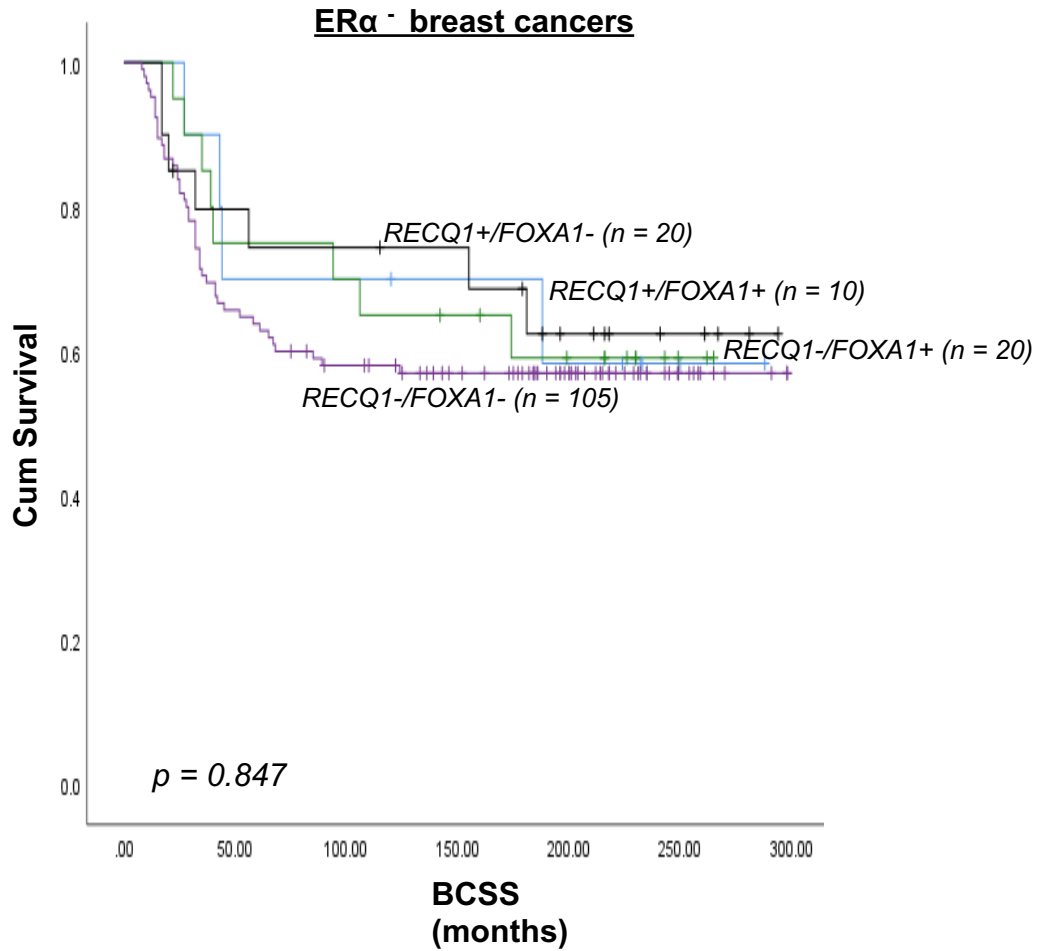

**Fig. S7.** Kaplan Meier curves for RECQ1/FOXA1 co-expression and breast cancer-specific survival (BCSS) in ER $\alpha$  breast cancers.
